# Supplementary material
Source: PubMed Central journal article supplement (PMC7484148)
Supplement: NIHMS1599329-supplement-Supplemental_File_S3.pdf [file NIHMS1599329-supplement-Supplemental_File_S3.pdf]

| <b>Reactome Pathway</b>                                                      | <b># of Nodes</b> | <b>PRS (score)</b> |
|------------------------------------------------------------------------------|-------------------|--------------------|
| PTK6 promotes HIF1A stabilization                                            | 6                 | 16.26              |
| Common Pathway of Fibrin Clot Formation                                      | 22                | 13.38              |
| Antimicrobial peptides                                                       | 36                | 12.72              |
| Defensins                                                                    | 15                | 11.14              |
| Biosynthesis of DHA-derived SPMs                                             | 17                | 10.08              |
| Formation of a pool of free 40S subunits                                     | 102               | 9.88               |
| Formation of Fibrin Clot (Clotting Cascade)                                  | 39                | 9.55               |
| Peptide chain elongation                                                     | 89                | 8.99               |
| Eukaryotic Translation Elongation                                            | 94                | 8.91               |
| L13a-mediated translational silencing of Ceruloplasmin                       | 112               | 8.86               |
| Interleukin-10 signaling                                                     | 45                | 8.78               |
| Selenocysteine synthesis                                                     | 92                | 8.47               |
| Biosynthesis of specialized proresolving mediators (SPMs)                    | 19                | 8.41               |
| GTP hydrolysis and joining of the 60S ribosomal subunit                      | 113               | 8.34               |
| Selenoamino acid metabolism                                                  | 116               | 8.27               |
| Eukaryotic Translation Termination                                           | 93                | 7.74               |
| Regulation of TLR by endogenous ligand                                       | 14                | 6.98               |
| Eukaryotic Translation Initiation                                            | 120               | 6.97               |
| Cap-dependent Translation Initiation                                         | 120               | 6.97               |
| Nonsense Mediated Decay (NMD) independent of the 5' cap                      | 96                | 6.86               |
| ERBB2 Activates PTK6 Signaling                                               | 13                | 6.63               |
| SRP-dependent cotranslational protein targeting to the ER                    | 113               | 6.59               |
| Chemokine receptors bind chemokines                                          | 48                | 6.48               |
| Synthesis of Lipoxins (LX)                                                   | 6                 | 6.29               |
| Hyaluronan metabolism                                                        | 10                | 6.15               |
| Hyaluronan uptake and degradation                                            | 10                | 6.15               |
| Degradation of the extracellular matrix                                      | 104               | 5.96               |
| Complement cascade                                                           | 144               | 5.87               |
| Creation of C4 and C2 activators                                             | 102               | 5.51               |
| Dectin-2 family                                                              | 61                | 5.45               |
| ERBB2 Regulates Cell Motility                                                | 15                | 5.35               |
| Fibronectin matrix formation                                                 | 6                 | 5.20               |
| Signaling by PTK6                                                            | 54                | 5.18               |
| Signaling by Non-Receptor Tyrosine Kinases                                   | 54                | 5.18               |
| Regulation of Complement cascade                                             | 133               | 5.10               |
| Formation of the ternary complex, and subsequently initiation of translation | 52                | 5.04               |
| Pyrimidine salvage                                                           | 8                 | 4.72               |
| rRNA processing in the nucleus and cytosol                                   | 191               | 4.70               |
| Major pathway of rRNA processing in the nucleolus and cytosol                | 183               | 4.66               |
| rRNA processing                                                              | 196               | 4.65               |
| Ribosomal scanning and start codon recognition                               | 58                | 4.59               |
| Peptide ligand-binding receptors                                             | 187               | 4.52               |
| Class A/1 (Rhodopsin-like receptors)                                         | 203               | 4.45               |
| G alpha (i) signalling events                                                | 393               | 4.35               |
| Collagen degradation                                                         | 25                | 4.34               |
| PI3K events in ERBB2 signaling                                               | 16                | 4.31               |
| Translation initiation complex formation                                     | 59                | 4.30               |

|                                                     |      |      |
|-----------------------------------------------------|------|------|
| Intraflagellar transport                            | 41   | 4.10 |
| Nonsense-Mediated Decay (NMD)                       | 116  | 4.10 |
| Nonsense Mediated Decay (NMD) enhanced by the Ex    | 116  | 4.10 |
| Toll-like Receptor Cascades                         | 152  | 4.06 |
| Activation of the mRNA upon binding of the cap-bind | 60   | 4.06 |
| Visual phototransduction                            | 94   | 4.02 |
| Triglyceride biosynthesis                           | 14   | 3.88 |
| TICAM1, TRAF6-dependent induction of TAK1 comple    | 16   | 3.79 |
| RAF-independent MAPK1/3 activation                  | 23   | 3.71 |
| Downregulation of ERBB2 signaling                   | 29   | 3.67 |
| Post-translational protein phosphorylation          | 107  | 3.54 |
| GPCR ligand binding                                 | 301  | 3.41 |
| Glycosaminoglycan metabolism                        | 116  | 3.30 |
| Signaling by GPCR                                   | 1184 | 3.24 |
| GPCR downstream signalling                          | 1133 | 3.09 |
| Translation                                         | 291  | 2.85 |

| <b>BH adj pval</b> | <b>Hierarchy level</b> | <b>Pathway Group</b>              |
|--------------------|------------------------|-----------------------------------|
| 0.0010             | 4                      | Signal Transduction               |
| 0.0010             | 3                      | Hemostasis                        |
| 0.0010             | 3                      | Immune System                     |
| 0.0010             | 4                      | Immune System                     |
| 0.0010             | 4                      | Metabolism                        |
| 0.0010             | 5                      | Metabolism of proteins            |
| 0.0010             | 2                      | Hemostasis                        |
| 0.0010             | 4                      | Metabolism of proteins            |
| 0.0010             | 3                      | Metabolism of proteins            |
| 0.0010             | 4                      | Metabolism of proteins            |
| 0.0010             | 4                      | Immune System                     |
| 0.0010             | 4                      | Metabolism                        |
| 0.0010             | 3                      | Metabolism                        |
| 0.0010             | 5                      | Metabolism of proteins            |
| 0.0010             | 3                      | Metabolism                        |
| 0.0010             | 3                      | Metabolism of proteins            |
| 0.0010             | 4                      | Immune System                     |
| 0.0010             | 3                      | Metabolism of proteins            |
| 0.0010             | 4                      | Metabolism of proteins            |
| 0.0010             | 3                      | Metabolism of RNA                 |
| 0.0010             | 4                      | Signal Transduction               |
| 0.0010             | 3                      | Metabolism of proteins            |
| 0.0030             | 6                      | Signal Transduction               |
| 0.0030             | 4                      | Metabolism                        |
| 0.0020             | 4                      | Metabolism                        |
| 0.0020             | 5                      | Metabolism                        |
| 0.0020             | 2                      | Extracellular matrix organization |
| 0.0050             | 3                      | Immune System                     |
| 0.0050             | 5                      | Immune System                     |
| 0.0050             | 4                      | Immune System                     |
| 0.0020             | 4                      | Signal Transduction               |
| 0.0080             | 2                      | Extracellular matrix organization |
| 0.0030             | 3                      | Signal Transduction               |
| 0.0030             | 2                      | Signal Transduction               |
| 0.0040             | 4                      | Immune System                     |
| 0.0030             | 5                      | Metabolism of proteins            |
| 0.0040             | 4                      | Metabolism                        |
| 0.0020             | 3                      | Metabolism of RNA                 |
| 0.0010             | 4                      | Metabolism of RNA                 |
| 0.0020             | 2                      | Metabolism of RNA                 |
| 0.0020             | 5                      | Metabolism of proteins            |
| 0.0050             | 5                      | Signal Transduction               |
| 0.0050             | 4                      | Signal Transduction               |
| 0.0010             | 4                      | Signal Transduction               |
| 0.0080             | 3                      | Extracellular matrix organization |
| 0.0080             | 4                      | Signal Transduction               |
| 0.0030             | 6                      | Metabolism of proteins            |

|        |   |                                      |
|--------|---|--------------------------------------|
| 0.0050 | 3 | Organelle biogenesis and maintenance |
| 0.0030 | 2 | Metabolism of RNA                    |
| 0.0030 | 3 | Metabolism of RNA                    |
| 0.0050 | 3 | Immune System                        |
| 0.0070 | 5 | Metabolism of proteins               |
| 0.0070 | 5 | Signal Transduction                  |
| 0.0090 | 4 | Metabolism                           |
| 0.0090 | 5 | Immune System                        |
| 0.0080 | 4 | Signal Transduction                  |
| 0.0100 | 4 | Signal Transduction                  |
| 0.0060 | 3 | Metabolism of proteins               |
| 0.0050 | 3 | Signal Transduction                  |
| 0.0070 | 3 | Metabolism                           |
| 0.0020 | 2 | Signal Transduction                  |
| 0.0020 | 3 | Signal Transduction                  |
| 0.0100 | 2 | Metabolism of proteins               |

## URL

<http://reactome.org/PathwayBrowser/#/R-HSA-8857538>  
<http://reactome.org/PathwayBrowser/#/R-HSA-140875>  
<http://reactome.org/PathwayBrowser/#/R-HSA-6803157>  
<http://reactome.org/PathwayBrowser/#/R-HSA-1461973>  
<http://reactome.org/PathwayBrowser/#/R-HSA-9018677>  
<http://reactome.org/PathwayBrowser/#/R-HSA-72689>  
<http://reactome.org/PathwayBrowser/#/R-HSA-140877>  
<http://reactome.org/PathwayBrowser/#/R-HSA-156902>  
<http://reactome.org/PathwayBrowser/#/R-HSA-156842>  
<http://reactome.org/PathwayBrowser/#/R-HSA-156827>  
<http://reactome.org/PathwayBrowser/#/R-HSA-6783783>  
<http://reactome.org/PathwayBrowser/#/R-HSA-2408557>  
<http://reactome.org/PathwayBrowser/#/R-HSA-9018678>  
<http://reactome.org/PathwayBrowser/#/R-HSA-72706>  
<http://reactome.org/PathwayBrowser/#/R-HSA-2408522>  
<http://reactome.org/PathwayBrowser/#/R-HSA-72764>  
<http://reactome.org/PathwayBrowser/#/R-HSA-5686938>  
<http://reactome.org/PathwayBrowser/#/R-HSA-72613>  
<http://reactome.org/PathwayBrowser/#/R-HSA-72737>  
<http://reactome.org/PathwayBrowser/#/R-HSA-975956>  
<http://reactome.org/PathwayBrowser/#/R-HSA-8847993>  
<http://reactome.org/PathwayBrowser/#/R-HSA-1799339>  
<http://reactome.org/PathwayBrowser/#/R-HSA-380108>  
<http://reactome.org/PathwayBrowser/#/R-HSA-2142700>  
<http://reactome.org/PathwayBrowser/#/R-HSA-2142845>  
<http://reactome.org/PathwayBrowser/#/R-HSA-2160916>  
<http://reactome.org/PathwayBrowser/#/R-HSA-1474228>  
<http://reactome.org/PathwayBrowser/#/R-HSA-166658>  
<http://reactome.org/PathwayBrowser/#/R-HSA-166786>  
<http://reactome.org/PathwayBrowser/#/R-HSA-5621480>  
<http://reactome.org/PathwayBrowser/#/R-HSA-6785631>  
<http://reactome.org/PathwayBrowser/#/R-HSA-1566977>  
<http://reactome.org/PathwayBrowser/#/R-HSA-8848021>  
<http://reactome.org/PathwayBrowser/#/R-HSA-9006927>  
<http://reactome.org/PathwayBrowser/#/R-HSA-977606>  
<http://reactome.org/PathwayBrowser/#/R-HSA-72695>  
<http://reactome.org/PathwayBrowser/#/R-HSA-73614>  
<http://reactome.org/PathwayBrowser/#/R-HSA-8868773>  
<http://reactome.org/PathwayBrowser/#/R-HSA-6791226>  
<http://reactome.org/PathwayBrowser/#/R-HSA-72312>  
<http://reactome.org/PathwayBrowser/#/R-HSA-72702>  
<http://reactome.org/PathwayBrowser/#/R-HSA-375276>  
<http://reactome.org/PathwayBrowser/#/R-HSA-373076>  
<http://reactome.org/PathwayBrowser/#/R-HSA-418594>  
<http://reactome.org/PathwayBrowser/#/R-HSA-1442490>  
<http://reactome.org/PathwayBrowser/#/R-HSA-1963642>  
<http://reactome.org/PathwayBrowser/#/R-HSA-72649>

<http://reactome.org/PathwayBrowser/#/R-HSA-5620924>  
<http://reactome.org/PathwayBrowser/#/R-HSA-927802>  
<http://reactome.org/PathwayBrowser/#/R-HSA-975957>  
<http://reactome.org/PathwayBrowser/#/R-HSA-168898>  
<http://reactome.org/PathwayBrowser/#/R-HSA-72662>  
<http://reactome.org/PathwayBrowser/#/R-HSA-2187338>  
<http://reactome.org/PathwayBrowser/#/R-HSA-75109>  
<http://reactome.org/PathwayBrowser/#/R-HSA-9014325>  
<http://reactome.org/PathwayBrowser/#/R-HSA-112409>  
<http://reactome.org/PathwayBrowser/#/R-HSA-8863795>  
<http://reactome.org/PathwayBrowser/#/R-HSA-8957275>  
<http://reactome.org/PathwayBrowser/#/R-HSA-500792>  
<http://reactome.org/PathwayBrowser/#/R-HSA-1630316>  
<http://reactome.org/PathwayBrowser/#/R-HSA-372790>  
<http://reactome.org/PathwayBrowser/#/R-HSA-388396>  
<http://reactome.org/PathwayBrowser/#/R-HSA-72766>
